# Supplementary material for: The Beneficial Effect of Eco-Friendly Green Nanoparticles Using Garcinia mangostana Peel Extract against Pathogenicity of Listeria monocytogenes in Female BALB/c Mice
Source: PubMed Central journal article supplement (PMC7222409; doi:10.3390/ani10040573), 2020-03-29
Supplement: animals-10-00573-s001.pdf [file animals-10-00573-s001.pdf]

**Table S1.** Content of total phenols, flavonoids, and antioxidant activity of flavonoids free-radical scavenging (DPPH and ABTS) and ferric reducing antioxidant power (FRAP) in methanol-extracted air- and freeze-dried mangosteen peel nanoparticles.

| Name of sample                             | T. Phenols (mg gallic acid/g sample)<br>M ± SD | T. Flavonoids (mg catechin/g sample)<br>M ± SD | DPPH (%)<br>M ± SD | ABTS (g trolox/g sample)<br>M ± SD | FRAP (g trolox/g sample)<br>M ± SD |
|--------------------------------------------|------------------------------------------------|------------------------------------------------|--------------------|------------------------------------|------------------------------------|
| Air-dried mangosteen peel                  | 401.303 ± 14.498                               | 1.057 ± 0.119                                  | 94.775 ± 0.122     | 13.075 ± 0.534                     | 5.728 ± 0.152                      |
| Air-dried mangosteen peel nanoparticles    | 479.744 ± 2.564                                | 4.711 ± 0.207                                  | 94.303 ± 0.074     | 16.069 ± 0.424                     | 6.696 ± 0.085                      |
| Freeze-dried Mangosteen peel               | 815.311 ± 3.935                                | 15.394 ± 1.496                                 | 94.643 ± 0.128     | 29.943 ± 0.058                     | 12.982 ± 0.368                     |
| Freeze-dried mangosteen peel nanoparticles | 1112.646 ± 1.842                               | 14.154 ± 0.119                                 | 95.707 ± 0.070     | 42.753 ± 0.200                     | 17.806 ± 0.056                     |

Values are means of three replicates. Results were given as mean ± SD.

10<sup>10</sup> CFU/ml

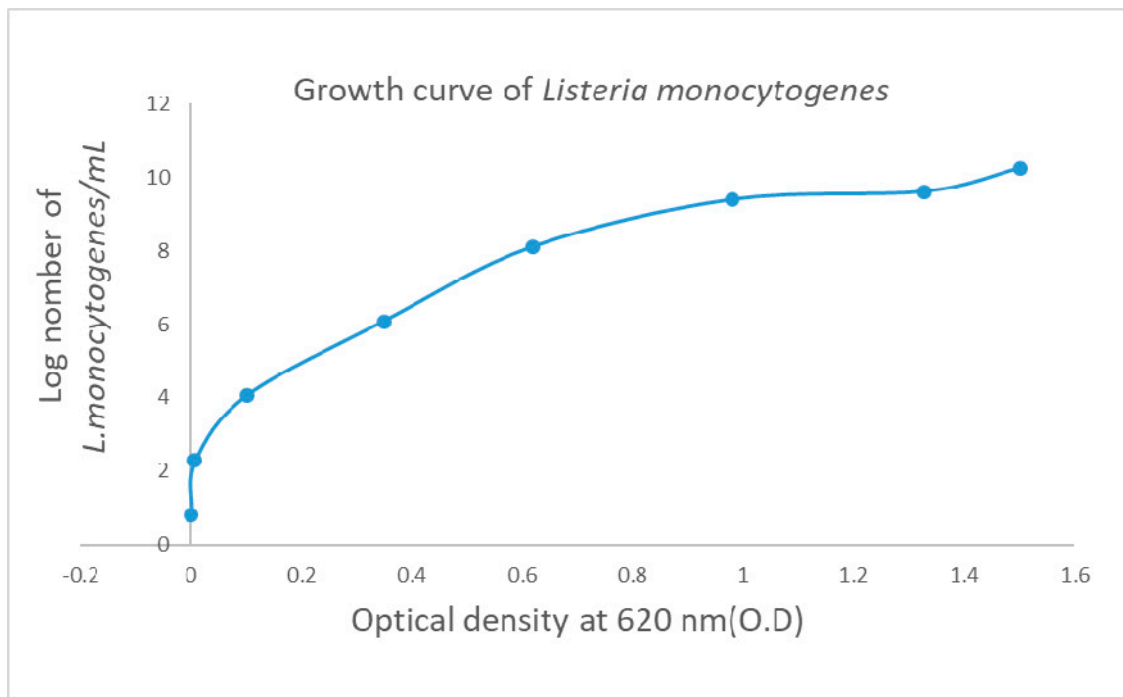

**Figure S1.** Total viable count of *Listeria monocytogenes* ATCC 19114 against Optical density at 620 nm.

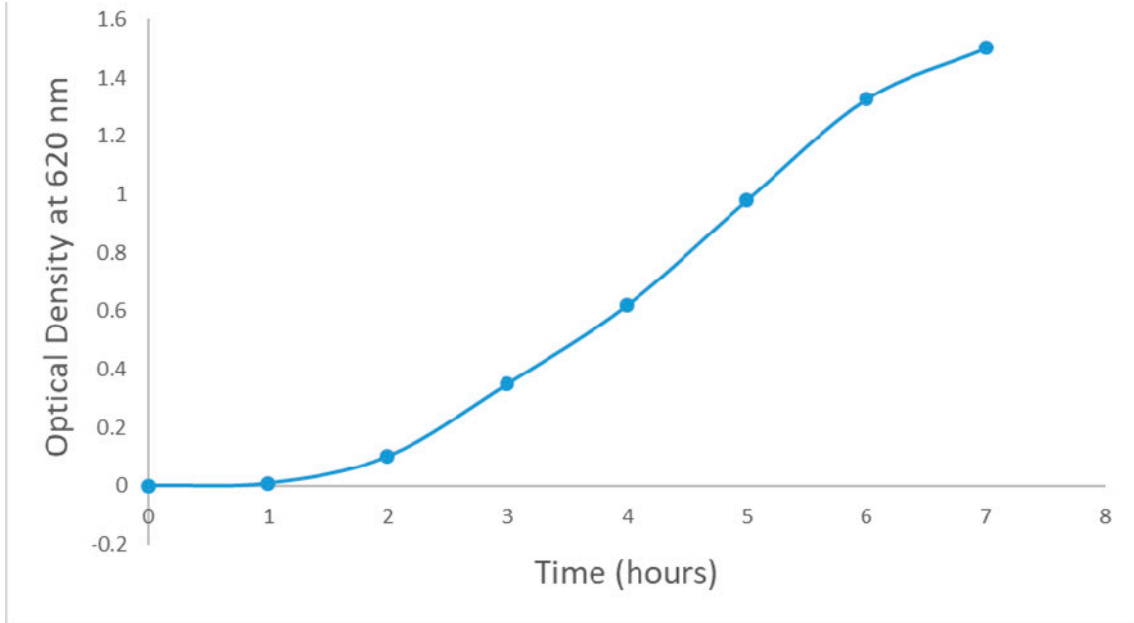

Figure S2: optical density of *Listeria monocytogenes* ATCC 19114 at 620 nm at different time per hours.
